# Supplementary material
Source: Springer Nature journal article supplement (https://www.springermedizin.de/resource/supplementary/13058_2013_3448_MOESM2_ESM.pdf/9704034)
Supplement: MOESM2 [file 9704034]

# Supplementary Table 2S

## Tumor characteristics of cases included in the study

| <b>Parity</b>             | <b>N</b> | <b>P</b> | <b>L</b> | <b>≤1<br/>mo</b> | <b>&gt;1≤6<br/>mo</b> | <b>&gt;6≤12<br/>mo</b> | <b>&gt;12≤18<br/>mo</b> | <b>&gt;18≤24<br/>mo</b> | <b>&gt;2≤3<br/>yr</b> | <b>&gt;3≤6<br/>yr</b> | <b>&gt;6≤10<br/>yr</b> | <b>&gt;10<br/>yr</b> |
|---------------------------|----------|----------|----------|------------------|-----------------------|------------------------|-------------------------|-------------------------|-----------------------|-----------------------|------------------------|----------------------|
| <i>Cancer</i>             | 18       | 5        | 0        | 6                | 4                     | 5                      | 5                       | 19                      | 7                     | 17                    | 10                     | 24                   |
| <i>Benign</i>             | 5        | 11       | 8        | 0                | 5                     | 0                      | 0                       | 1                       | 0                     | 0                     | 0                      | 1                    |
| <b>Histologic Subtype</b> |          |          |          |                  |                       |                        |                         |                         |                       |                       |                        |                      |
| <i>Ductal(D)</i>          | 15       | 5        | 0        | 6                | 4                     | 4                      | 4                       | 18                      | 6                     | 13                    | 10                     | 20                   |
| <i>Lobular(L)</i>         | 1        | 0        | 0        | 0                | 0                     | 1                      | 0                       | 0                       | 1                     | 2                     | 0                      | 1                    |
| <i>D+L</i>                | 2        | 0        | 0        | 0                | 0                     | 0                      | 0                       | 0                       | 0                     | 0                     | 0                      | 0                    |
| <i>other</i>              | 0        | 0        | 0        | 0                | 0                     | 0                      | 1                       | 0                       | 0                     | 2                     | 0                      | 3                    |
| <b>Biological Subtype</b> |          |          |          |                  |                       |                        |                         |                         |                       |                       |                        |                      |
| <i>Luminal A</i>          | 7        | 1        | 0        | 3                | 2                     | 2                      | 3                       | 10                      | 3                     | 6                     | 2                      | 12                   |
| <i>Luminal B</i>          | 3        | 2        | 0        | 0                | 0                     | 1                      | 1                       | 2                       | 0                     | 3                     | 3                      | 3                    |
| <i>Her-2</i>              | 2        | 1        | 0        | 1                | 1                     | 0                      | 1                       | 1                       | 2                     | 1                     | 1                      | 2                    |
| <i>TN</i>                 | 3        | 1        | 0        | 1                | 1                     | 2                      | 0                       | 2                       | 2                     | 5                     | 2                      | 4                    |
| <i>Unknown</i>            | 3        | 0        | 0        | 1                | 0                     | 0                      | 0                       | 4                       | 0                     | 2                     | 2                      | 3                    |
| <b>Clinical Stage</b>     |          |          |          |                  |                       |                        |                         |                         |                       |                       |                        |                      |
| <i>0</i>                  | 3        | 0        | 0        | 1                | 0                     | 0                      | 0                       | 1                       | 0                     | 1                     | 0                      | 3                    |
| <i>I</i>                  | 5        | 2        | 0        | 2                | 0                     | 2                      | 2                       | 7                       | 0                     | 3                     | 1                      | 7                    |
| <i>II</i>                 | 8        | 2        | 0        | 1                | 2                     | 2                      | 2                       | 7                       | 6                     | 9                     | 6                      | 12                   |
| <i>III</i>                | 1        | 0        | 0        | 2                | 2                     | 1                      | 1                       | 3                       | 1                     | 4                     | 3                      | 2                    |
| <i>IV</i>                 | 1        | 1        | 0        | 0                | 0                     | 0                      | 0                       | 1                       | 0                     | 0                     | 0                      | 0                    |
